# Supplementary material for: Designing Tasks through Second Life for CFL Learners in the UK University
Source: Hindawi journal article supplement (doi:10.1155/2023/9632734), 2023-05-03
Supplement: f1 [file 9632734.f1.doc]

**Appendix**

**Appendix 1：Proposed Decision-making task**

| **Details** | | | | | | |
| --- | --- | --- | --- | --- | --- | --- |
| Students’ Language level | | | University CFL Beginner level | Venue | Computer lab | |
| Student numbers | | | 6 | Lesson Time | 1 hour | |
| **Overview** | | | | | | |
| **Aims and Objectives** | | | | | | |
| By the end of the lesson. Students will be able to:  1) Complete the assigned decision-making task at the farmers’ bank on SL Chinese Island and buy 2 kinds of vegetables and 2 kinds sofmeatsuitable for making dumplings stuffing for a total price of no more than 50 RMB  2) Ask for the price of each ingredient in appropriate language.  Bargain for a cheaper price of the ingredients in appropriate language.  Buy vegetables and meat in appropriate language. | | | | | | |
| **Target Language Vocabulary** | | | | | | |
| zhūròu, niúròu, zhūròu mò, niúròu mò, jīròu, qīngcài, húluóbo, dàbáicài, càixīn, mógū, qīngjiāo jiǎozi, jiǎozi xiàn, shìhé, bù shìhé.  **Sentence pattern:**  wǒ xiǎng mǎi...... duō shǎo qián? / zěnme mài?...... shí yuán yì jīn. wǒ mǎi yì jīn.  kěyǐ piányí xiē ma? yígòng...... yuán.  shìhé zuò jiǎozi xiàn ma?  shìhé/bù shìhé zuò jiǎozi xiàn. | | | | | | |
| **Materials** | | | | | | |
| Computer/Second Life/Headset/Microphone | | | | | | |
| **Perceived Difficulties** | | | | | | |
| As this is a task carried out on the network, technical problems may occur. Therefore, before starting the task, students need to check their equipment, such as headphones and microphones. | | | | | | |
| **Contingency Plans** | | | | | | |
| lf the student’s equipment breaks down during the task they need to replace it or seek help from the technical department in a timely manner. | | | | | | |
| **Lesson Plan** | | | | | | |
| Time | Stage | Activity | | | | Interaction |
| **10 minutes** | **Pre-task** | The students assemble in the Chinese classroom at SL Chinese Island.  The teacher announces the task: Transfer to the SL farmers’ banket. But two kinds of meats and two kinds of vegetables suitable for making dumpling stuffing and the total price of all the ingredients should not be over 50 RMB.  The teacher introduces the target language elements that may be needed. | | | | T-S |
| **35 minutes** | **Task-cycle** | **Task:** Students chat with the nonplayer character (bot) of the stall owner and ask for the price of the ingredients that are appropriate for making dumpling stuffing and then bargain with stallholders and request the ingredients at a cheaper price.  Students focus on a consultative discussion to decide on the ingredients to purchase so that the total price does not surpass 50 RMB (This task has several different solutions. and the amount of each ingredient bought can be freely matched as long as the requirements of the task are met).  **Task report:** After completing their assigned tasks as needed. students transfer to the SL Chinese classroom and report back to the teacher on their purchased ingredients. Teachers check for compliance.  Teachers monitor and observe the language used by the students during this process. | | | | 1. S   S-T |
| **15**  **minutes** | **Post-task** | Focus on language forms, give corrections to language errors that occur in students’ dialogues, and practice vocabularies and sentence patterns related to grocery shopping. | | | | T-S |

**Appendix 2: Proposed Problem-solving task**

| **Details** | | | | | | |
| --- | --- | --- | --- | --- | --- | --- |
| Students’ Language level | | | University CFL Beginner level | Venue | Computer lab | |
| Student numbers | | | 6 | Lesson Time | 1 hour | |
| **Overview** | | | | | | |
| **Aims and Objectives** | | | | | | |
| By the end of the lesson. Students will be able to:   1. Complete the assigned problem-solving task. Choose and order the appropriate cuisine for the different dietary needs of visitors in the SL Chinese Island restaurants. 2. Describe your own dietary needs in appropriate language.   Order your meal in Chinese. | | | | | | |
| **Target Language Vocabulary** | | | | | | |
| **Vocabulary**  wèi dào, tián/bù tián, là/bù là. suān/bù suān, xián/bù xián yì wǎn, yì pán, yì zhī.  **Phrase**  yì wǎn zhá jiàng miàn, yì pán fānqié chǎo dàn, yì zhī táng cù yú.  **Sentence pattern**  wǒ lái yì wǎn zhájiàng miàn, wǒ lái yì pán fānqié chǎo dàn, wǒ lái yì zhī tángcù yú.  wǒ xǐ huān/bù xǐ huān......  wǒ néng chī/wǒ bù néng chī......  zhè pán cài wèi dào shì tián de.  zhè pán cài hěn là. | | | | | | |
| **Materials** | | | | | | |
| Computer/Second Life/Headset/Microphone | | | | | | |
| **Perceived Difficulties** | | | | | | |
| As this is a task carried out on the network, technical problems may occur. Therefore, before starting the task, students need to check their equipment, such as headphones and microphones. | | | | | | |
| **Contingency Plans** | | | | | | |
| If the student’s equipment breaks down during the task, they need to replace it or seek help from the technical department in a timely manner. | | | | | | |
| **Lesson Plan** | | | | | | |
| Time | Stage | Activity | | | | Interaction |
| **10 minutes** | **Pre-task** | Students arrive at the SL restaurant and are seated at tables.  The teacher declares the task: each person will take on the role of a visitor to the Chinese Island. where each person has special dietary requirements: Halal vegetarian. Sweet and sour flavours. spicy. sweet and seafood. Noodles The above roles are assigned to each student via SL private message.  Choose the dishes from “fānqié chǎo dàn, táng cù yú, zhá jiàng miàn, hóng shāo niúròu, gū lǎo ròu, yú xiāng ròu sī”.  Review the vocabularies and phrases needed for tasks related to ordering food and dietary needs. | | | | T-S |
| **35 minutes** | **Task-cycle** | Every student will describe their dietary requirements to other visitors who wills-S guess his or her dietary requirements, for example, vegetarian, Halal.  The visitors at the table then need to discuss what to order for different needs based on the ingredient list for each dish provided by SL Chinese Island.  Order food in Chinese from a waiter in an avatar controlled by the teacher.  The teacher checks if the dishes at each person’s table match the participants’ dietary requirements to determine if they have completed this problem-solving task. | | | | 1. S   S-T |
| **15**  **minutes** | **Post-task** | Teachers need to address some of the language issues that arise in students’ communication and practice by expanding on the specific language forms used in the task. | | | | T-S |
